# Supplementary material for: Increased spontaneous MEG signal diversity for psychoactive doses of ketamine, LSD and psilocybin
Source: PubMed Central journal article supplement (PMC5396066; doi:10.1038/srep46421), 2017-04-19
Supplement: srep46421-s1.pdf [file srep46421-s1.pdf]

*Supplementary figures for:*  
**Increased spontaneous MEG signal diversity for psychoactive  
doses of ketamine, LSD and psilocybin**

Michael M. Schartner, Robin Carhart-Harris, Adam B. Barrett,  
Anil K. Seth, Suresh D. Muthukumaraswamy

January 19, 2017

PSIL, 14 subj.

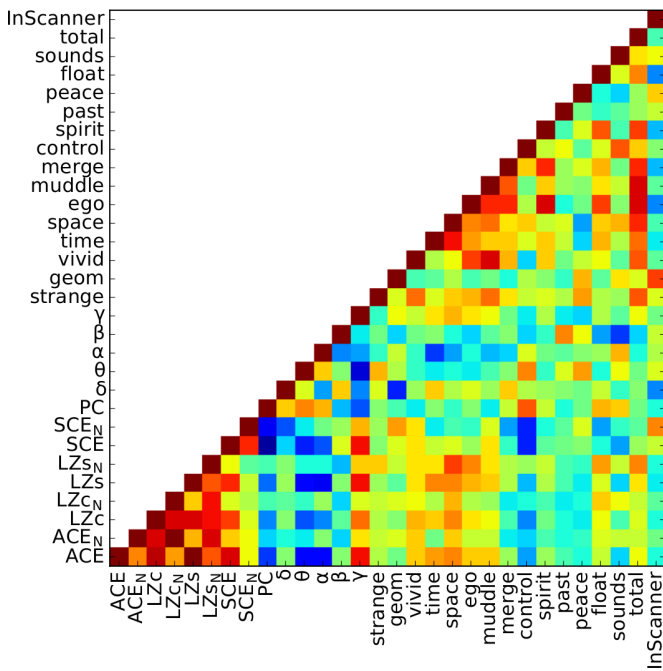

KET, 19 subj.

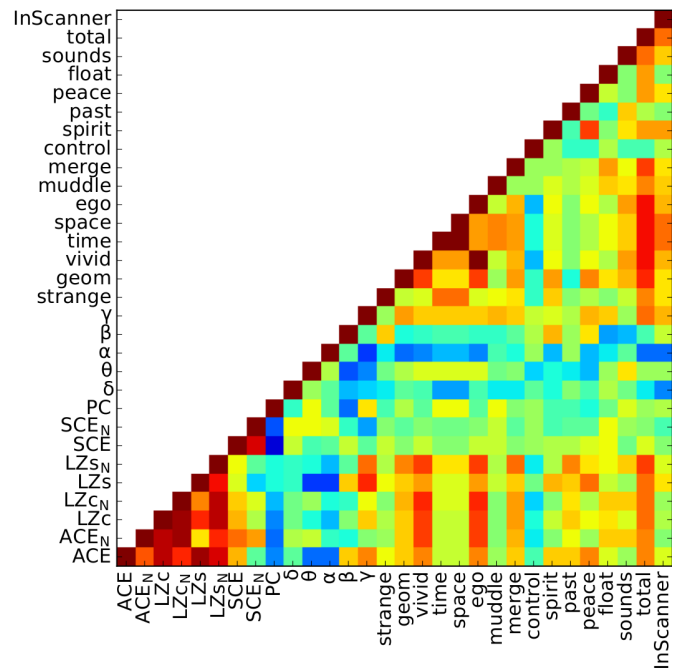

LSD, 15 subj.

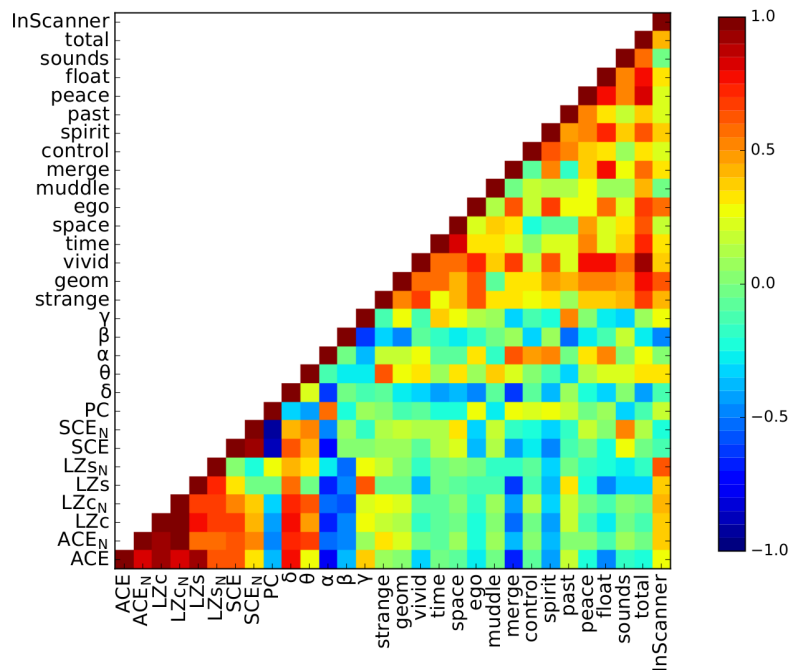

Figure S1: **Full correlations across measures and questionnaire answers.** For each drug, the Pearson correlation,  $r$ , of the score difference between drug and placebo condition (averaged across trials) of any measure (subjective rating) pair across subjects is shown. See main text for details.
